# Supplementary material
Source: PubMed Central journal article supplement (PMC3307288)
Supplement: supp_M111.317883_jbc.M111.317883-1.pdf [file supp_M111.317883_jbc.M111.317883-1.pdf]

## Supplemental data

**Figure S1.** The 6-HB structure formed by SFT and N36 peptides. Ribbon model of 6-HB form by SFT and N36 (HIV gp41 NHR<sub>35-70</sub>) in different views with the labels. (A) Side view of the 6-HB; (B) Top view of the 6-HB. The N36 peptides are colored in gray; the SFT peptides are colored in light blue.

**Figure S2.** Phylogenetic analysis of 43 HIV-1 Env sequences derived from the subtypes A, B and C that dominate the AIDS epidemics worldwide, and subtype B', CRF07\_BC and CRF01\_AE recombinants that are currently circulating in China.

**Table S1.** Sequence alignment of the NHR and CHR of HIV-1 gp41. Both NHR and CHR sequences show high variability.

**Fig. S1**

**A**

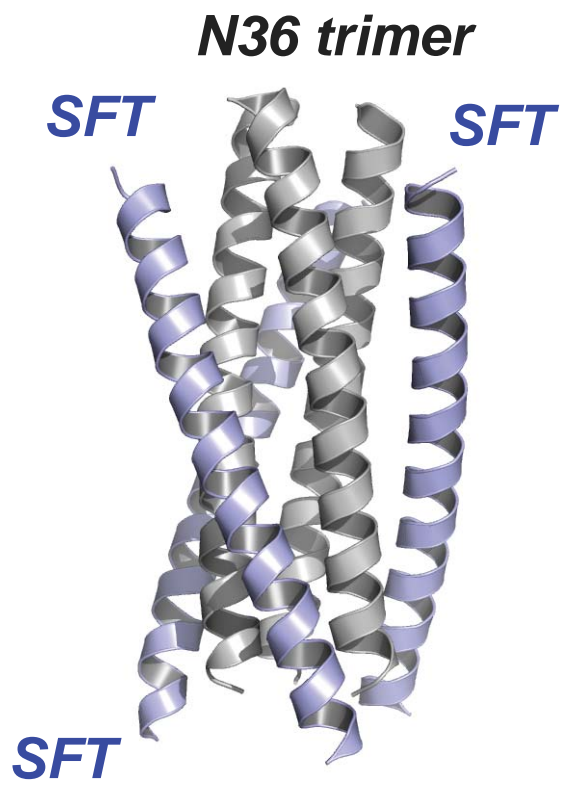

**B**

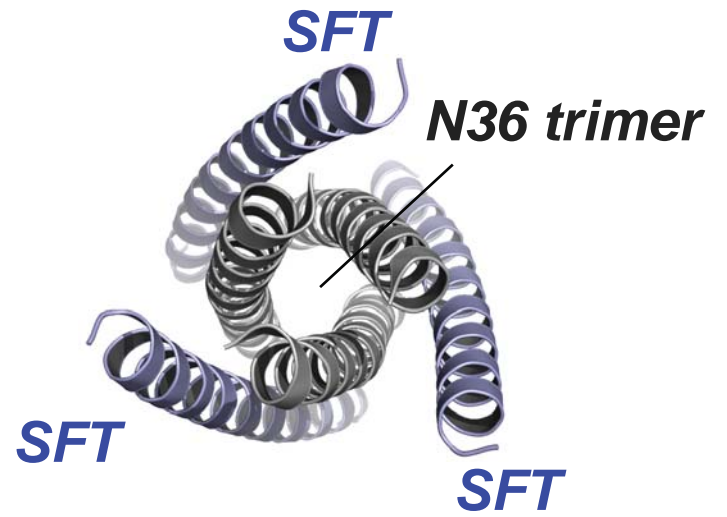

**Fig. S2**

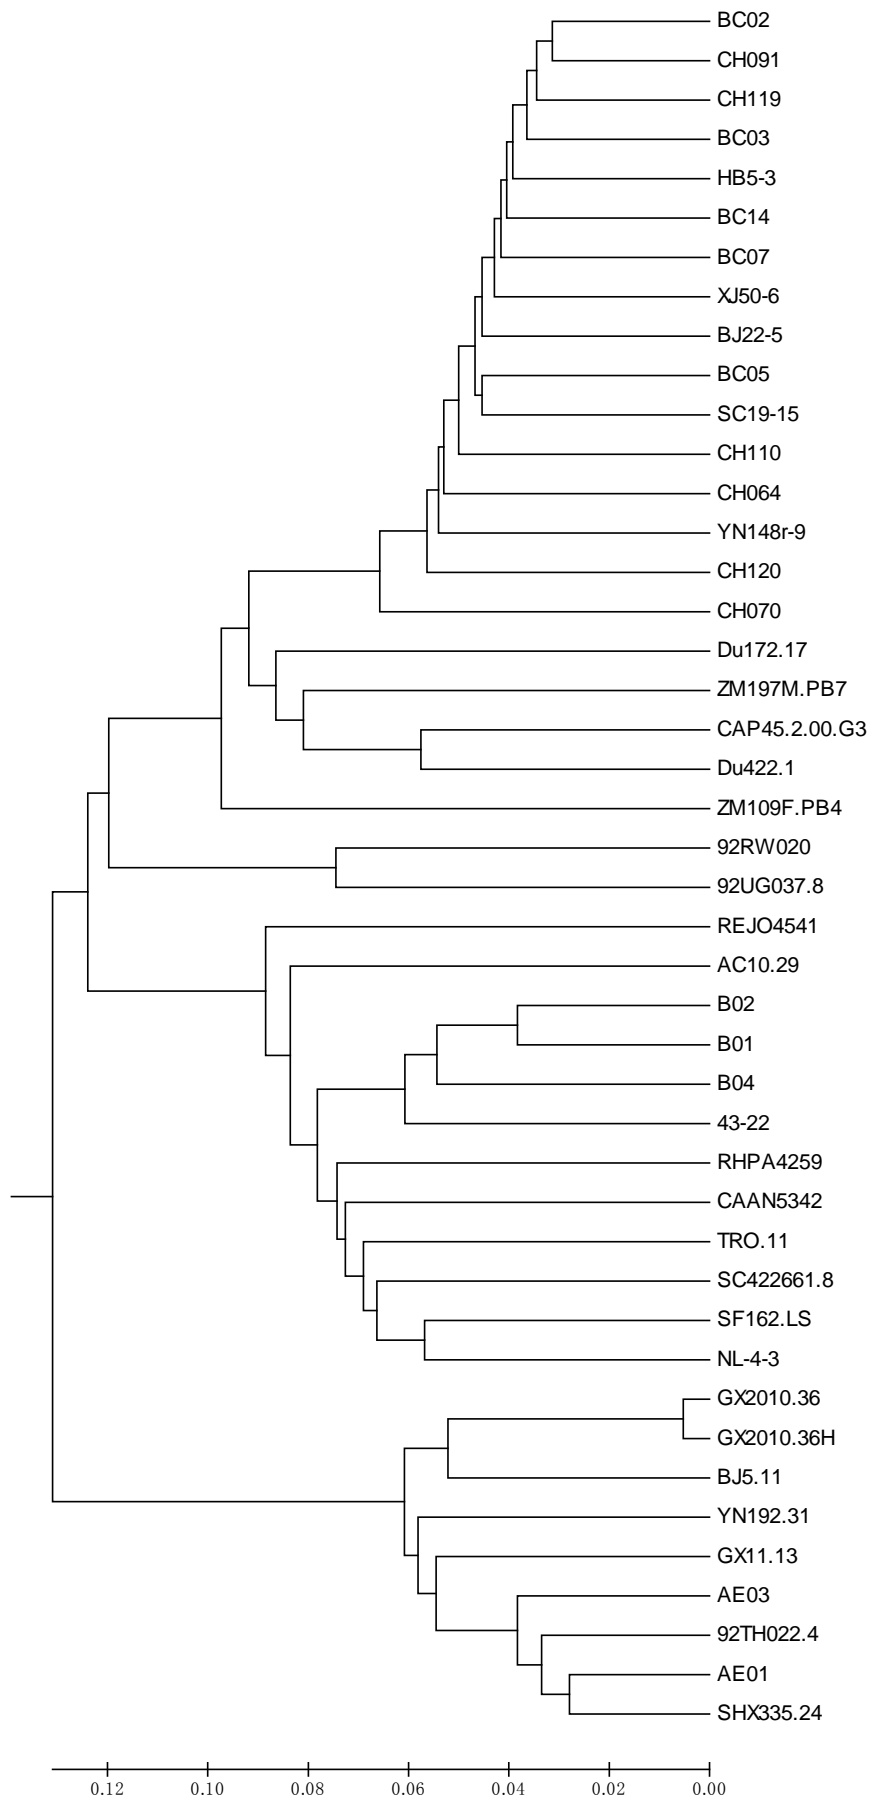

## Supplemental Table S1.

Table S1. Alignment of the NHR and CHR sequences of HIV-1 gp41

| Pseudovirus      | Accession no. | Clade | NHR sequence                                                | CHR sequence                                      |
|------------------|---------------|-------|-------------------------------------------------------------|---------------------------------------------------|
| NL4-3            | AF324493_8    | B     | QARQLLSDIV QQQNNLLRAI EAQQHLLQLT VWGIKQLQAR ILAVERYLKD QQLL | WMEWDREINN YTSLIHSLIE ESQNQEKNE QELLELDKWA SLWNWF |
| SF162. LS        | EU123924      | B     | .....G..... V.....                                          | ...E...D...N...YT... .....                        |
| AC10. 0. 29      | AY835446      | B     | ...L...G..... V.....R.....                                  | ..Q....S.....YT... .....                          |
| TRO. 11          | AY835445      | B     | ...L...G.....M..... V.....R.....                            | ...E...D...D...YI.L. K..I.....S.....              |
| REJ04541         | AY835449      | B     | .....G...S..... V..M.S.....                                 | .R..EK..D...D...YT...K.....                       |
| RHPA4259         | AY835447      | B     | ...L...G...S..... V.....                                    | ..Q.E...D...D...YN.L. ....A.....S..               |
| CAAN5342         | AY835452      | B     | ...L...G..... V..I.....                                     | ...EK..D...GI.YN.L. ....D...K.....T..             |
| SC422661. 8      | AY835441      | B     | ...L...G..... V.....R.....                                  | .....YN.L. DA.....                                |
| Du172. 17        | DQ411853      | C     | .....G...S.....M.....T. V..I.....                           | ..Q.....NT.Y..L. ....KD..A..S.E...S..             |
| Du422. 1         | DQ411854. 1   | C     | .....G...S.....T. V..I.....                                 | ..Q....S...NT.FR.L. D.....KD..A..S.K.N....        |
| ZM197M. PB7      | DQ388515. 1   | C     | .....G...S.....M.....T. V..I.....                           | ..Q....D...QV.YQ.L. V.....ND..A...N...S..         |
| ZM109F. PB4      | AY424138. 2   | C     | .....G...S..... V..I...Q.....                               | ..Q..K.VS...FT.YQ.L. ...Y...Q..K...A.N..N.D..S..  |
| CAP45. 2. 00. G3 | DQ435682. 1   | C     | .....G...S.....M.....T. V..I.....                           | .IQ....S...SNT.YK.L. G.....Q..KD..A..S.N.N....    |
| 92RW020          | AY669706. 1   | A     | .....G...S.....M.K..... V.....                              | .LQ..K..S...QI.YN... ..D..A.....                  |
| 92UG037. 8       | U09127. 1     | A     | .V.K...G...S.....K..... V.....R.....                        | .LQ..K..S...HI.YE... ..K.....N.....               |
| 92TH022. 4       | AY669778. 1   | E     | .....G...S.....X..M..... V.....KF.                          | .T..E...S...NQ.YEILT .....DR..KD.....             |
| CH064            | EF117254      | B/C   | H.....G...S.....T. V..I.....                                | ..Q..K..S...A.YK.L. ...D.....KD..A..S.K.N....     |
| CH070            | EF117255      | B/C   | .....G.....K..... V..I.....                                 | ..Q..K... ..I.Y..L. D..I.....KD..A..S.N.N....     |
| CH091            | EF117256      | B/C   | .....G...S.....T. V..I.....                                 | ..Q..K..S...T.YR.L. D.....R..KD..A..S.K.N..S..    |
| CH110            | EF117257      | B/C   | .....G...S.....T. V..I.....                                 | ..Q..K..S...NT.YR.L. ....KD..A..S.K.N..S..        |
| CH119            | EF117261      | B/C   | .....G...S.....T. V..I.....                                 | ..Q..K..S...NT.YK.L. D.....S..KD..A..S.N.N....    |
| CH120            | EF117260      | B/C   | .....G...S...K.....T. V..I.....                             | ..Q..K..S...NT.Y..L. ...I.....KD..A..S.K.N....    |
| SC19-15          | ADT65148      | B/C   | .....G...S.....T. V.....                                    | ..Q..K..S...NT.YR.L. D.....R..KD..A..S.K.N....    |
| BJ22-5           | ADT65144      | B/C   | .....G.....M.....T. V..I.....                               | ..Q..K..S...DT.YR.L. V.....R..KD..A..S.K.N....    |

|             |             |     |                                        |                                                    |
|-------------|-------------|-----|----------------------------------------|----------------------------------------------------|
| BC07        | ABY71530    | B/C | .....G...S.....H.....T. V..I....E .... | ..Q.E...S. ..DT.YR.L. D.....R.. KD..A..S.N N.....  |
| BC14        | ABY71537    | B/C | .....G...S...K... ..T. V..I.....       | ..Q..K... ..DI.YR.L. ...S...R.. KD..A..S.K N..S..  |
| YN148r-9    | ADT65158    | B/C | .....G...S..... ..V..M.....            | ..Q..K..S. ..NT.YR.L. D.....R.. KD..A..S.Q N.....  |
| XJ50-6      | ADT65154    | B/C | .....G...S..... ..T. V..I.....         | ..Q.EE..S. ...T.YR.L. .... KD..A..S.K N.....       |
| HB5-3       | ADT65143    | B/C | .....G...S..... ..T. V..I...Q. ....    | ..Q..K..S. ..YT.YR.L. .... KD..A..S.K N.....       |
| BC02        | ABY71525    | B/C | .....G...S..... ..T. V..I.....         | ..Q..K..S. ..NT.YR.L. D.....R.. KD..A..S.K N.....  |
| BC03        | ABY71526    | B/C | .....G...S.....M.....T. V..I...R. .... | ..Q..K..S. ..KT.YQ.L. D..Y...R.. KD..A..S.K N..S.. |
| BC05        | ABY71528    | B/C | .....G...S..... ..T. V..M.....         | ..Q.....SK ..NT.YG.L. D.....R.. KD..A..S.K N..T..  |
| B02         | ABY71519    | B'  | .....G...R..... ..V.....               | ...E...D. ..RE.YT... ..L.....                      |
| 43-22       | CHH         | B'  | .....G...R..... ..V.....               | ...E...A. ..KE.YT... Q..... L..... S..             |
| B01         | ABY71518    | B'  | ...M..G...R..... ..V.....              | ..Q.E..... ..RE.YA... ..L.....                     |
| B04         | ABY71521    | B'  | .....G...R..... ..V.....               | ..Q.E...D. ..KE.YT... ..LD..K..E.. ..              |
| SHX335. 24  | ADD83190    | A/E | .....G...S.....M.....V.....T..         | ..I..EK..S. ...Q.YKILT ...D..DR.. KD.....          |
| YN192. 31   | GU475046    | A/E | .....G...S..... ..V.....Q. .KF.        | ..T..E...S. ..NK.YG.LT .....DR.. KD.....           |
| AE03        | ABY71544    | A/E | .....G...S.....V.....V.....KF.         | ..I..E...S. ..NQ.YEILT .....D... KD.....T N.....   |
| GX2010. 36  | ADD83183    | A/E | .....G...S.....K.....V.....N. .KF.     | ..T..E...S. ..DT.YQ.LT .....D... KD.....N.....     |
| GX11. 13    | GU475042    | A/E | .....FG...S.....V.....V.....KF.        | ..T..E...S. ..NQ.YEILT .....DR.. KD.....           |
| GX2010. 36H | GU475026. 1 | A/E | .....G...S.....K.....V.....N. .KF.     | ..T..E...S. ..NT.YQ.LT .....D... KD.....           |
| AE01        | ABY71542    | A/E | .....G...S..... ..V.....KF.            | ..I..E...S. ...Q.YEILT .....DR.. KD.....           |
| BJ5. 11     | ADD83181    | A/E | .....G...S.....M.....V.....KF.         | ..I..EK..S. ..NK.YD.LT .....R.. KD.....            |

---
